# Supplementary material
Source: HighWire-hosted journal article supplement (https://learnmem.cshlp.org/content/suppl/2023/08/09/30.8.151)
Supplement: Supplementary_material.docx [file Supplementary_material.docx]

**Supplementary Material**

Sensitivity and power analyses were conducted in R using the packages *simr* v.1.0.5 (Green & MacLeod, 2016) and *lme4* v.1.1.27.1 (Bates et al., 2015). For the sensitivity analyses, mixed effects models fit in *lme4* were passed to the *simr* function *powerSim*, with the effect size for the fixed effect of interest iteratively adjusted downward until power dropped to, without falling below, the desired level of 80%. For the post-hoc power curves, mixed effects models with the *observed* effect sizes were passed to the *simr* function *powerCurve,* with power evaluated for 5 different sample sizes (evenly spaced from 15-75 for Experiments 1 and 2, and from 20 to 68 for Experiment 3). Alpha was set to 0.05 and simulations to 500 for each result. The figures of the power curves are displayed for each experiment below.

**Figure S1**

*Power Curve for Experiment 1*


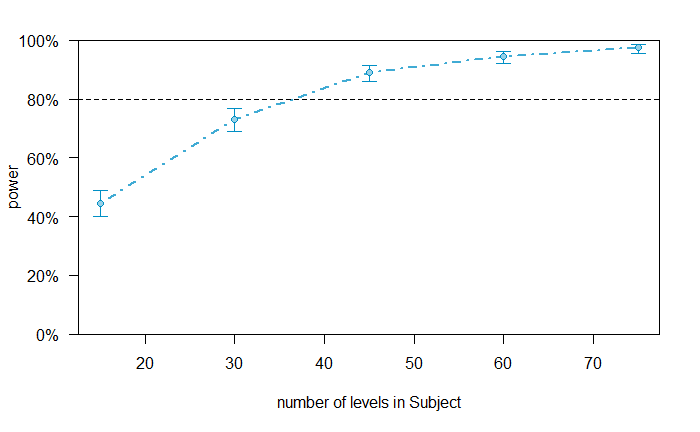


*Note.* Power to detect a difference in final List 1 recall depending on List 2 recall for items recalled in the interpolated phase in the A-B, A-C condition including testing without feedback, with an effect size of odds ratio (OR) = 3.43. Sample sizes evaluated for N = 15-75. Power = 80% at approximately N = 40.

**Figure S2**

*Power Curve for Experiment 2*


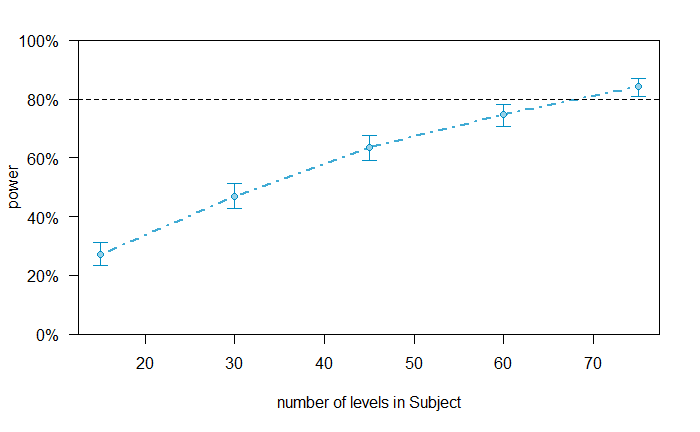


*Note.* Power to detect a difference in final List 1 recall depending on List 2 recall for items recalled in the interpolated phase in the A-B, A-C condition including testing without feedback, with an effect size of odds ratio (OR) = 4.45. Sample sizes evaluated for N = 15-75. Power = 80% at approximately N = 70.

**Figure S3**

*Power Curve for Experiment 3*


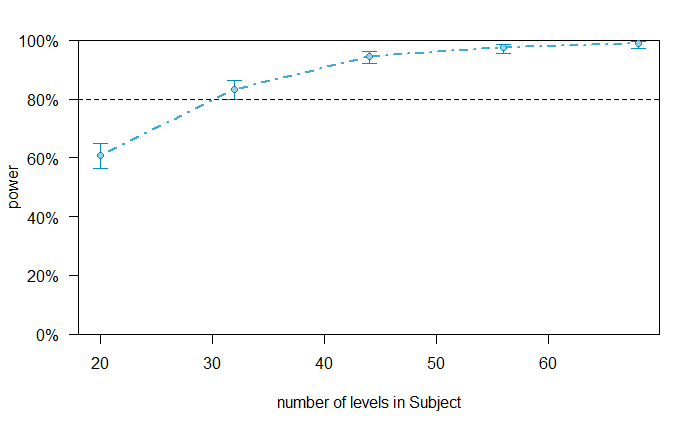


*Note.* Power to detect a difference in final List 1 recall depending on List 2 recall for items recalled in the interpolated phase in the A-B, A-C condition including testing without feedback, with an effect size of odds ratio (OR) = 5.51. Sample sizes evaluated for N = 12-68. Power = 80% at approximately N = 32.

**References**

Bates, D., Mächler, M., Bolker, B., & Walker, S. (2015). Fitting linear mixed-effects models using lme4. *Journal of Statistical Software, 67*, 1-48.

Green, P., & MacLeod, C. J. simr: an R package for power analysis of generalized linear mixed models by simulation. *Methods in Ecology and Evolution, 7(4)*, 493-498.
